# Supplementary material
Source: ML conference proceedings conference paper supplement (https://openreview.net/forum?id=l1gmW9YBcWb)
Supplement: supplementary_material [file attachment]

---

# Posterior Sampling-Based Online Learning for the Stochastic Shortest Path Model (Supplementary Material)

---

Mehdi Jafarnia-Jahromi<sup>1</sup>

Liyu Chen<sup>3</sup>

Rahul Jain<sup>2,3,4</sup>

Haipeng Luo<sup>3</sup>

<sup>1</sup>Google DeepMind

<sup>2</sup>ECE Department, University of Southern California

<sup>3</sup>CS Department, University of Southern California

<sup>4</sup>USC Center for Autonomy and AI

## A PROOFS

### A.1 PROOF OF LEMMA 4.2

**Lemma** (restatement of Lemma 4.2). The number of epochs is bounded as  $L_M \leq \sqrt{2SAK \log T_M} + SA \log T_M$ .

*Proof.* Define macro epoch  $i$  with start time  $t_{u_i}$  given by  $t_{u_1} = t_1$ , and

$$t_{u_{i+1}} = \min \{t_\ell > t_{u_i} : n_{t_\ell}(s, a) > 2n_{t_{\ell-1}}(s, a) \text{ for some } (s, a)\}, \quad i = 2, 3, \dots$$

A macro epoch starts when the second criterion of determining epoch length triggers. Let  $N_M$  be a random variable denoting the total number of macro epochs by the end of interval  $M$  and define  $u_{N_M+1} := L_M + 1$ .

Recall that  $K_\ell$  is the number of visits to the goal state in epoch  $\ell$ . Let  $\tilde{K}_i := \sum_{\ell=u_i}^{u_{i+1}-1} K_\ell$  be the number of visits to the goal state in macro epoch  $i$ . By definition of macro epochs, all the epochs within a macro epoch except the last one are triggered by the first criterion, i.e.,  $K_\ell = K_{\ell-1} + 1$  for  $\ell = u_i, \dots, u_{i+1} - 2$ . Thus,

$$\tilde{K}_i = \sum_{\ell=u_i}^{u_{i+1}-1} K_\ell = K_{u_{i+1}-1} + \sum_{j=1}^{u_{i+1}-u_i-1} (K_{u_i-1} + j) \geq \sum_{j=1}^{u_{i+1}-u_i-1} j = \frac{(u_{i+1} - u_i - 1)(u_{i+1} - u_i)}{2}.$$

Solving for  $u_{i+1} - u_i$  implies that  $u_{i+1} - u_i \leq 1 + \sqrt{2\tilde{K}_i}$ . We can write

$$\begin{aligned} L_M = u_{N_M+1} - 1 &= \sum_{i=1}^{N_M} (u_{i+1} - u_i) \leq \sum_{i=1}^{N_M} \left(1 + \sqrt{2\tilde{K}_i}\right) = N_M + \sum_{i=1}^{N_M} \sqrt{2\tilde{K}_i} \\ &\leq N_M + \sqrt{2N_M \sum_{i=1}^{N_M} \tilde{K}_i} = N_M + \sqrt{2N_M K}, \end{aligned}$$

where the second inequality follows from Cauchy-Schwarz. It suffices to show that the number of macro epochs is bounded as  $N_M \leq 1 + SA \log T_M$ . Let  $\mathcal{T}_{s,a}$  be the set of all time steps at which the second criterion is triggered for state-action pair  $(s, a)$ , i.e.,

$$\mathcal{T}_{s,a} := \{t_\ell \leq T_M : n_{t_\ell}(s, a) > 2n_{t_{\ell-1}}(s, a)\}.$$

We claim that  $|\mathcal{T}_{s,a}| \leq \log n_{T_M+1}(s, a)$ . To see this, assume by contradiction that  $|\mathcal{T}_{s,a}| \geq 1 + \log n_{T_M+1}(s, a)$ , then

$$\begin{aligned} n_{t_{L_M}}(s, a) &= \prod_{\substack{t_\ell \leq T_M, n_{t_{\ell-1}}(s, a) \geq 1}} \frac{n_{t_\ell}(s, a)}{n_{t_{\ell-1}}(s, a)} \geq \prod_{\substack{t_\ell \in \mathcal{T}_{s,a}, n_{t_{\ell-1}}(s, a) \geq 1}} \frac{n_{t_\ell}(s, a)}{n_{t_{\ell-1}}(s, a)} \\ &> 2^{|\mathcal{T}_{s,a}|-1} \geq n_{T_M+1}(s, a), \end{aligned}$$

which is a contradiction. Thus,  $|\mathcal{T}_{s,a}| \leq \log n_{T_M+1}(s, a)$  for all  $(s, a)$ . In the above argument, the first inequality is by the fact that  $n_t(s, a)$  is non-decreasing in  $t$ , and the second inequality is by the definition of  $\mathcal{T}_{s,a}$ . Now, we can write

$$\begin{aligned} N_M &= 1 + \sum_{s,a} |\mathcal{T}_{s,a}| \leq 1 + \sum_{s,a} \log n_{T_M+1}(s, a) \\ &\leq 1 + SA \log \frac{\sum_{s,a} n_{T_M+1}(s, a)}{SA} = 1 + SA \log \frac{T_M}{SA} \leq SA \log T_M, \end{aligned}$$

where the second inequality follows from Jensen's inequality.  $\square$

## A.2 PROOF OF LEMMA 4.3

**Lemma** (restatement of Lemma 4.3). The first term  $R_M^1$  is bounded as  $R_M^1 \leq B_\star \mathbb{E}[L_M]$ .

*Proof.* Recall

$$R_M^1 = \mathbb{E} \left[ \sum_{\ell=1}^{L_M} \sum_{t=t_\ell}^{t_{\ell+1}-1} [V(s_t; \theta_\ell) - V(s_{t+1}; \theta_\ell)] \right]$$

Observe that the inner sum is a telescopic sum, thus

$$R_M^1 = \mathbb{E} \left[ \sum_{\ell=1}^{L_M} [V(s_{t_\ell}; \theta_\ell) - V(s_{t_{\ell+1}}; \theta_\ell)] \right] \leq B_\star \mathbb{E}[L_M],$$

where the inequality is by Assumption 2.1.  $\square$

## A.3 PROOF OF LEMMA 4.4

**Lemma** (restatement of Lemma 4.4). The second term  $R_M^2$  is bounded as  $R_M^2 \leq B_\star \mathbb{E}[L_M]$ .

*Proof.* Recall that  $K_\ell$  is the number of times the goal state is reached during epoch  $\ell$ . By definition, the only time steps that  $s'_t \neq s_{t+1}$  is right before reaching the goal. Thus, with  $V(g; \theta_\ell) = 0$ , we can write

$$\begin{aligned} R_M^2 &= \mathbb{E} \left[ \sum_{\ell=1}^{L_M} \sum_{t=t_\ell}^{t_{\ell+1}-1} [V(s_{t+1}; \theta_\ell) - V(s'_t; \theta_\ell)] \right] - K \mathbb{E}[V(s_{\text{init}}; \theta_\star)] \\ &= \mathbb{E} \left[ \sum_{\ell=1}^{L_M} V(s_{\text{init}}; \theta_\ell) K_\ell \right] - K \mathbb{E}[V(s_{\text{init}}; \theta_\star)] \\ &= \sum_{\ell=1}^{\infty} \mathbb{E} [\mathbf{1}_{\{m(t_\ell) \leq M\}} V(s_{\text{init}}; \theta_\ell) K_\ell] - K \mathbb{E}[V(s_{\text{init}}; \theta_\star)], \end{aligned}$$

where the last step is by Monotone Convergence Theorem. Here  $m(t_\ell)$  is the interval at time  $t_\ell$ . Note that from the first stopping criterion of the algorithm we have  $K_\ell \leq K_{\ell-1} + 1$  for all  $\ell$ . Thus, each term in the summation can be bounded as

$$\mathbb{E} [\mathbf{1}_{\{m(t_\ell) \leq M\}} V(s_{\text{init}}; \theta_\ell) K_\ell] \leq \mathbb{E} [\mathbf{1}_{\{m(t_\ell) \leq M\}} V(s_{\text{init}}; \theta_\ell) (K_{\ell-1} + 1)].$$

$\mathbf{1}_{\{m(t_\ell) \leq M\}} (K_{\ell-1} + 1)$  is  $\mathcal{F}_{t_\ell}$  measurable. Therefore, applying the property of posterior sampling (Lemma 4.1) implies

$$\mathbb{E} [\mathbf{1}_{\{m(t_\ell) \leq M\}} V(s_{\text{init}}; \theta_\ell) (K_{\ell-1} + 1)] = \mathbb{E} [\mathbf{1}_{\{m(t_\ell) \leq M\}} V(s_{\text{init}}; \theta_\star) (K_{\ell-1} + 1)]$$

Substituting this into  $R_M^2$ , we obtain

$$\begin{aligned}
R_M^2 &\leq \sum_{\ell=1}^{\infty} \mathbb{E} \left[ \mathbf{1}_{\{m(t_\ell) \leq M\}} V(s_{\text{init}}; \theta_*) (K_{\ell-1} + 1) \right] - K \mathbb{E} [V(s_{\text{init}}; \theta_*)] \\
&= \mathbb{E} \left[ \sum_{\ell=1}^{L_M} V(s_{\text{init}}; \theta_*) (K_{\ell-1} + 1) \right] - K \mathbb{E} [V(s_{\text{init}}; \theta_*)] \\
&= \mathbb{E} \left[ V(s_{\text{init}}; \theta_*) \left( \sum_{\ell=1}^{L_M} K_{\ell-1} - K \right) \right] + \mathbb{E} [V(s_{\text{init}}; \theta_*) L_M] \leq B_* \mathbb{E} [L_M].
\end{aligned}$$

In the last inequality we have used the fact that  $0 \leq V(s_{\text{init}}; \theta_*) \leq B_*$  and  $\sum_{\ell=1}^{L_M} K_{\ell-1} \leq K$ .  $\square$

#### A.4 PROOF OF LEMMA 4.5

**Lemma** (restatement of Lemma 4.5). The third term  $R_M^3$  can be bounded as

$$R_M^3 \leq 288B_*S\sqrt{MA\log^2\frac{SA\mathbb{E}[T_M]}{\delta}} + 1632B_*S^2A\log^2\frac{SA\mathbb{E}[T_M]}{\delta} + 4SB_*\delta\mathbb{E}[L_M].$$

*Proof.* With abuse of notation let  $\ell := \ell(t)$  denote the epoch at time  $t$  and  $m(t)$  be the interval at time  $t$ . We can write

$$\begin{aligned}
R_M^3 &= \mathbb{E} \left[ \sum_{t=1}^{T_M} \left[ V(s'_t; \theta_\ell) - \sum_{s'} \theta_\ell(s'|s_t, a_t) V(s'; \theta_\ell) \right] \right] \\
&= \mathbb{E} \left[ \sum_{t=1}^{\infty} \mathbf{1}_{\{m(t) \leq M\}} \left[ V(s'_t; \theta_\ell) - \sum_{s'} \theta_\ell(s'|s_t, a_t) V(s'; \theta_\ell) \right] \right] \\
&= \sum_{t=1}^{\infty} \mathbb{E} \left[ \mathbf{1}_{\{m(t) \leq M\}} \mathbb{E} \left[ V(s'_t; \theta_\ell) - \sum_{s'} \theta_\ell(s'|s_t, a_t) V(s'; \theta_\ell) \middle| \mathcal{F}_t, \theta_*, \theta_\ell \right] \right].
\end{aligned}$$

The last equality follows from Dominated Convergence Theorem, tower property of conditional expectation, and that  $\mathbf{1}_{\{m(t) \leq M\}}$  is measurable with respect to  $\mathcal{F}_t$ . Note that conditioned on  $\mathcal{F}_t, \theta_*$  and  $\theta_\ell$ , the only random variable in the inner expectation is  $s'_t$ . Thus,  $\mathbb{E}[V(s'_t; \theta_\ell) | \mathcal{F}_t, \theta_*, \theta_\ell] = \sum_{s'} \theta_*(s'|s_t, a_t) V(s'; \theta_\ell)$ . Using Dominated Convergence Theorem again implies that

$$\begin{aligned}
R_M^3 &= \mathbb{E} \left[ \sum_{t=1}^{T_M} \sum_{s' \in \mathcal{S}^+} [\theta_*(s'|s_t, a_t) - \theta_\ell(s'|s_t, a_t)] V(s'; \theta_\ell) \right] \\
&= \mathbb{E} \left[ \sum_{t=1}^{T_M} \sum_{s' \in \mathcal{S}^+} [\theta_*(s'|s_t, a_t) - \theta_\ell(s'|s_t, a_t)] \left( V(s'; \theta_\ell) - \sum_{s'' \in \mathcal{S}^+} \theta_*(s''|s_t, a_t) V(s''; \theta_\ell) \right) \right], \quad (1)
\end{aligned}$$

where the last equality is due to the fact that  $\theta_*(\cdot|s_t, a_t)$  and  $\theta_\ell(\cdot|s_t, a_t)$  are probability distributions and that  $\sum_{s'' \in \mathcal{S}^+} \theta_*(s''|s_t, a_t) V(s''; \theta_\ell)$  is independent of  $s'$ .

Recall the Bernstein confidence set  $B_\ell(s, a)$  defined in (4) and let  $\Omega_{s,a}^\ell$  be the event that both  $\theta_*(\cdot|s, a)$  and  $\theta_\ell(\cdot|s, a)$  are in  $B_\ell(s, a)$ . If  $\Omega_{s,a}^\ell$  holds, then the difference between  $\theta_*(\cdot|s, a)$  and  $\theta_\ell(\cdot|s, a)$  can be bounded by the following lemma.

**Lemma A.1.** Denote  $A_\ell(s, a) = \frac{\log(SAn_\ell^+(s, a)/\delta)}{n_\ell^+(s, a)}$ . If  $\Omega_{s,a}^\ell$  holds, then

$$|\theta_*(s'|s, a) - \theta_\ell(s'|s, a)| \leq 8\sqrt{\theta_*(s'|s, a)A_\ell(s, a)} + 136A_\ell(s, a).$$

*Proof.* Since  $\Omega_{s,a}^\ell$  holds, by (4) we have that

$$\widehat{\theta}_\ell(s'|s, a) - \theta_*(s'|s, a) \leq 4\sqrt{\widehat{\theta}_\ell(s'|s, a)A_\ell(s, a)} + 28A_\ell(s, a).$$

Using the primary inequality that  $x^2 \leq ax + b$  implies  $x \leq a + \sqrt{b}$  with  $x = \sqrt{\widehat{\theta}_\ell(s'|s, a)}$ ,  $a = 4\sqrt{A_\ell(s, a)}$ , and  $b = \theta_*(s'|s, a) + 28A_\ell(s, a)$ , we obtain

$$\sqrt{\widehat{\theta}_\ell(s'|s, a)} \leq 4\sqrt{A_\ell(s, a)} + \sqrt{\theta_*(s'|s, a) + 28A_\ell(s, a)} \leq \sqrt{\theta_*(s'|s, a)} + 10\sqrt{A_\ell(s, a)},$$

where the last inequality is by sub-linearity of the square root. Substituting this bound into (4) yields

$$|\theta_*(s'|s, a) - \widehat{\theta}_\ell(s'|s, a)| \leq 4\sqrt{\theta_*(s'|s, a)A_\ell(s, a)} + 68A_\ell(s, a).$$

Similarly,

$$|\theta_\ell(s'|s, a) - \widehat{\theta}_\ell(s'|s, a)| \leq 4\sqrt{\theta_*(s'|s, a)A_\ell(s, a)} + 68A_\ell(s, a).$$

Using the triangle inequality completes the proof.  $\square$

Note that if either of  $\theta_*(\cdot|s_t, a_t)$  or  $\theta_\ell(\cdot|s_t, a_t)$  is not in  $B_\ell(s_t, a_t)$ , then the inner term of (1) can be bounded by  $2SB_*$  (note that  $|\mathcal{S}^+| \leq 2S$  and  $V(\cdot; \theta_\ell) \leq B_*$ ). Thus, applying Lemma A.1 implies that

$$\begin{aligned} & \sum_{s' \in \mathcal{S}^+} [\theta_*(s'|s_t, a_t) - \theta_\ell(s'|s_t, a_t)] \left( V(s'; \theta_\ell) - \sum_{s'' \in \mathcal{S}^+} \theta_*(s''|s_t, a_t) V(s''; \theta_\ell) \right) \\ & \leq 8 \sum_{s' \in \mathcal{S}^+} \sqrt{A_\ell(s_t, a_t) \theta_*(s'|s_t, a_t)} \left( V(s'; \theta_\ell) - \sum_{s'' \in \mathcal{S}^+} \theta_*(s''|s_t, a_t) V(s''; \theta_\ell) \right)^2 \mathbf{1}_{\Omega_{s_t, a_t}^\ell} \\ & \quad + 136 \sum_{s' \in \mathcal{S}^+} A_\ell(s_t, a_t) \left| V(s'; \theta_\ell) - \sum_{s'' \in \mathcal{S}^+} \theta_*(s''|s_t, a_t) V(s''; \theta_\ell) \right| \mathbf{1}_{\Omega_{s_t, a_t}^\ell} \\ & \quad + 2SB_* (\mathbf{1}_{\{\theta_*(\cdot|s_t, a_t) \notin B_\ell(s_t, a_t)\}} + \mathbf{1}_{\{\theta_\ell(\cdot|s_t, a_t) \notin B_\ell(s_t, a_t)\}}) \\ & \leq 16\sqrt{SA_\ell(s_t, a_t)} \mathbb{V}_\ell(s_t, a_t) \mathbf{1}_{\Omega_{s_t, a_t}^\ell} + 272SB_* A_\ell(s_t, a_t) \mathbf{1}_{\Omega_{s_t, a_t}^\ell} \\ & \quad + 2SB_* (\mathbf{1}_{\{\theta_*(\cdot|s_t, a_t) \notin B_\ell(s_t, a_t)\}} + \mathbf{1}_{\{\theta_\ell(\cdot|s_t, a_t) \notin B_\ell(s_t, a_t)\}}). \end{aligned}$$

where  $A_\ell(s, a) = \frac{\log(SAn_\ell^+(s, a)/\delta)}{n_\ell^+(s, a)}$  and  $\mathbb{V}_\ell(s, a)$  is defined in (5). Here the last inequality follows from Cauchy-Schwarz,  $|\mathcal{S}^+| \leq 2S$ ,  $V(\cdot; \theta_\ell) \leq B_*$  and the definition of  $\mathbb{V}_\ell$ . Substituting this into (1) yields

$$R_M^3 \leq 16\sqrt{SE} \left[ \sum_{t=1}^{T_M} \sqrt{A_\ell(s_t, a_t) \mathbb{V}_\ell(s_t, a_t)} \mathbf{1}_{\Omega_{s_t, a_t}^\ell} \right] \quad (2)$$

$$+ 272SB_* \mathbb{E} \left[ \sum_{t=1}^{T_M} A_\ell(s_t, a_t) \mathbf{1}_{\Omega_{s_t, a_t}^\ell} \right] \quad (3)$$

$$+ 2SB_* \mathbb{E} \left[ \sum_{t=1}^{T_M} (\mathbf{1}_{\{\theta_*(\cdot|s_t, a_t) \notin B_\ell(s_t, a_t)\}} + \mathbf{1}_{\{\theta_\ell(\cdot|s_t, a_t) \notin B_\ell(s_t, a_t)\}}) \right]. \quad (4)$$

The inner sum in (3) is bounded by  $6SA \log^2(SAT_M/\delta)$  (see Lemma A.4). To bound (4), we first show that  $B_\ell(s, a)$  contains the true transition probability  $\theta_*(\cdot|s, a)$  with high probability:

**Lemma A.2.** *For any epoch  $\ell$  and any state-action pair  $(s, a) \in \mathcal{S} \times \mathcal{A}$ ,  $\theta_*(\cdot|s, a) \in B_\ell(s, a)$  with probability at least  $1 - \frac{\delta}{2SAn_\ell^+(s, a)}$ .*

*Proof.* Fix  $(s, a, s') \in \mathcal{S} \times \mathcal{A} \times \mathcal{S}^+$  and  $0 < \delta' < 1$  (to be chosen later). Let  $(Z_i)_{i=1}^\infty$  be a sequence of random variables drawn from the probability distribution  $\theta_*(\cdot|s, a)$ . Apply Lemma A.3 below with  $X_i = \mathbf{1}_{\{Z_i=s'\}}$  and  $\delta_t = \frac{\delta'}{4S^2t^2}$  to a prefix of length  $t$  of the sequence  $(X_i)_{i=1}^\infty$ , and apply union bound over all  $t$  and  $s'$  to obtain

$$\left| \widehat{\theta}_\ell(s'|s, a) - \theta_*(s'|s, a) \right| \leq 2\sqrt{\frac{\widehat{\theta}_\ell(s'|s, a) \log \frac{8Sn_\ell^{+2}(s, a)}{\delta'}}{n_\ell^+(s, a)}} + 7 \log \frac{8Sn_\ell^{+2}(s, a)}{\delta'}$$

with probability at least  $1 - \delta'/2$  for all  $s' \in \mathcal{S}^+$  and  $\ell \geq 1$ , simultaneously. Choose  $\delta' = \delta/SAn_\ell^+(s, a)$  and use  $S \geq 2$ ,  $A \geq 2$  to complete the proof.  $\square$

**Lemma A.3** (Theorem D.3 (Anytime Bernstein) of Rosenberg et al. [2020]). *Let  $(X_n)_{n=1}^\infty$  be a sequence of independent and identically distributed random variables with expectation  $\mu$ . Suppose that  $0 \leq X_n \leq B$  almost surely. Then with probability at least  $1 - \delta$ , the following holds for all  $n \geq 1$  simultaneously:*

$$\left| \sum_{i=1}^n (X_i - \mu) \right| \leq 2 \sqrt{B \sum_{i=1}^n X_i \log \frac{2n}{\delta}} + 7B \log \frac{2n}{\delta}.$$

Now, by rewriting the sum in (4) over epochs, we have

$$\begin{aligned} & \mathbb{E} \left[ \sum_{t=1}^{T_M} \left( \mathbf{1}_{\{\theta_*(\cdot|s_t, a_t) \notin B_\ell(s_t, a_t)\}} + \mathbf{1}_{\{\theta_\ell(\cdot|s_t, a_t) \notin B_\ell(s_t, a_t)\}} \right) \right] \\ &= \mathbb{E} \left[ \sum_{\ell=1}^{L_M} \sum_{t=t_\ell}^{t_{\ell+1}-1} \left( \mathbf{1}_{\{\theta_*(\cdot|s_t, a_t) \notin B_\ell(s_t, a_t)\}} + \mathbf{1}_{\{\theta_\ell(\cdot|s_t, a_t) \notin B_\ell(s_t, a_t)\}} \right) \right] \\ &= \sum_{s, a} \mathbb{E} \left[ \sum_{\ell=1}^{L_M} \sum_{t=t_\ell}^{t_{\ell+1}-1} \mathbf{1}_{\{s_t=s, a_t=a\}} \left( \mathbf{1}_{\{\theta_*(\cdot|s, a) \notin B_\ell(s, a)\}} + \mathbf{1}_{\{\theta_\ell(\cdot|s, a) \notin B_\ell(s, a)\}} \right) \right] \\ &= \sum_{s, a} \mathbb{E} \left[ \sum_{\ell=1}^{L_M} (n_{t_{\ell+1}}(s, a) - n_{t_\ell}(s, a)) \left( \mathbf{1}_{\{\theta_*(\cdot|s, a) \notin B_\ell(s, a)\}} + \mathbf{1}_{\{\theta_\ell(\cdot|s, a) \notin B_\ell(s, a)\}} \right) \right]. \end{aligned}$$

Note that  $n_{t_{\ell+1}}(s, a) - n_{t_\ell}(s, a) \leq n_{t_\ell}(s, a) + 1$  by the second stopping criterion. Moreover, observe that  $B_\ell(s, a)$  is  $\mathcal{F}_{t_\ell}$  measurable. Thus, it follows from the property of posterior sampling (Lemma 4.1) that  $\mathbb{E}[\mathbf{1}_{\{\theta_\ell(\cdot|s, a) \notin B_\ell(s, a)\}} | \mathcal{F}_{t_\ell}] = \mathbb{E}[\mathbf{1}_{\{\theta_*(\cdot|s, a) \notin B_\ell(s, a)\}} | \mathcal{F}_{t_\ell}] = \mathbb{P}(\theta_*(\cdot|s, a) \notin B_\ell(s, a) | \mathcal{F}_{t_\ell}) \leq \delta/(2SAn_\ell^+(s, a))$ , where the inequality is by Lemma A.2. Using Monotone Convergence Theorem and that  $\mathbf{1}_{\{m(t_\ell) \leq M\}}$  is  $\mathcal{F}_{t_\ell}$  measurable, we can write

$$\begin{aligned} & \sum_{s, a} \mathbb{E} \left[ \sum_{\ell=1}^{L_M} (n_{t_{\ell+1}}(s, a) - n_{t_\ell}(s, a)) \left( \mathbf{1}_{\{\theta_*(\cdot|s, a) \notin B_\ell(s, a)\}} + \mathbf{1}_{\{\theta_\ell(\cdot|s, a) \notin B_\ell(s, a)\}} \right) \right] \\ & \leq \sum_{s, a} \sum_{\ell=1}^{\infty} \mathbb{E} \left[ \mathbf{1}_{\{m(t_\ell) \leq M\}} (n_{t_\ell}(s, a) + 1) \mathbb{E} \left[ \mathbf{1}_{\{\theta_*(\cdot|s, a) \notin B_\ell(s, a)\}} + \mathbf{1}_{\{\theta_\ell(\cdot|s, a) \notin B_\ell(s, a)\}} | \mathcal{F}_{t_\ell} \right] \right] \\ & \leq \sum_{s, a} \sum_{\ell=1}^{\infty} \mathbb{E} \left[ \mathbf{1}_{\{m(t_\ell) \leq M\}} (n_{t_\ell}(s, a) + 1) \frac{\delta}{SAn_\ell^+(s, a)} \right] \\ & \leq 2\delta \mathbb{E}[L_M], \end{aligned}$$

where the last inequality is by  $n_{t_\ell}(s, a) + 1 \leq 2n_\ell^+(s, a)$  and Monotone Convergence Theorem.

We proceed by bounding (2). Denote by  $t_m$  the start time of interval  $m$ , define  $t_{M+1} := T_M + 1$ , and rewrite the sum in (2) over intervals to get

$$\mathbb{E} \left[ \sum_{t=1}^{T_M} \sqrt{A_\ell(s_t, a_t)} \nabla_\ell(s_t, a_t) \mathbf{1}_{\Omega_{s_t, a_t}^\ell} \right] = \sum_{m=1}^M \mathbb{E} \left[ \sum_{t=t_m}^{t_{m+1}-1} \sqrt{A_\ell(s_t, a_t)} \nabla_\ell(s_t, a_t) \mathbf{1}_{\Omega_{s_t, a_t}^\ell} \right]$$

Applying Cauchy-Schwarz twice on the inner expectation implies

$$\begin{aligned}
& \mathbb{E} \left[ \sum_{t=t_m}^{t_{m+1}-1} \sqrt{A_\ell(s_t, a_t) \nabla_\ell(s_t, a_t)} \mathbf{1}_{\Omega_{s_t, a_t}^\ell} \right] \\
& \leq \mathbb{E} \left[ \sqrt{\sum_{t=t_m}^{t_{m+1}-1} A_\ell(s_t, a_t)} \cdot \sqrt{\sum_{t=t_m}^{t_{m+1}-1} \nabla_\ell(s_t, a_t) \mathbf{1}_{\Omega_{s_t, a_t}^\ell}} \right] \\
& \leq \sqrt{\mathbb{E} \left[ \sum_{t=t_m}^{t_{m+1}-1} A_\ell(s_t, a_t) \right]} \cdot \sqrt{\mathbb{E} \left[ \sum_{t=t_m}^{t_{m+1}-1} \nabla_\ell(s_t, a_t) \mathbf{1}_{\Omega_{s_t, a_t}^\ell} \right]} \\
& \leq 7B_\star \sqrt{\mathbb{E} \left[ \sum_{t=t_m}^{t_{m+1}-1} A_\ell(s_t, a_t) \right]},
\end{aligned}$$

where the last inequality is by Lemma A.5. Summing over  $M$  intervals and applying Cauchy-Schwarz, we get

$$\begin{aligned}
& \sum_{m=1}^M \mathbb{E} \left[ \sum_{t=t_m}^{t_{m+1}-1} \sqrt{A_\ell(s_t, a_t) \nabla_\ell(s_t, a_t)} \mathbf{1}_{\Omega_{s_t, a_t}^\ell} \right] \leq 7B_\star \sum_{m=1}^M \sqrt{\mathbb{E} \left[ \sum_{t=t_m}^{t_{m+1}-1} A_\ell(s_t, a_t) \right]} \\
& \leq 7B_\star \sqrt{M \sum_{m=1}^M \mathbb{E} \left[ \sum_{t=t_m}^{t_{m+1}-1} A_\ell(s_t, a_t) \right]} \\
& = 7B_\star \sqrt{M \mathbb{E} \left[ \sum_{t=1}^{T_M} A_\ell(s_t, a_t) \right]} \\
& \leq 18B_\star \sqrt{MSA \mathbb{E} \left[ \log^2 \frac{SAT_M}{\delta} \right]},
\end{aligned}$$

where the last inequality follows from Lemma A.4. Substituting these bounds in (2), (3), (4), concavity of  $\log^2 x$  for  $x \geq 3$ , and applying Jensen's inequality completes the proof.

**Lemma A.4.**  $\sum_{t=1}^{T_M} A_\ell(s_t, a_t) \leq 6SA \log^2(SAT_M/\delta)$ .

*Proof.* Recall  $A_\ell(s, a) = \frac{\log(SAn_\ell^+(s, a)/\delta)}{n_\ell^+(s, a)}$ . Denote by  $L := \log(SAT_M/\delta)$ , an upper bound on the numerator of  $A_\ell(s_t, a_t)$ . we have

$$\begin{aligned}
\sum_{t=1}^{T_M} A_\ell(s_t, a_t) & \leq \sum_{t=1}^{T_M} \frac{L}{n_\ell^+(s_t, a_t)} = L \sum_{s, a} \sum_{t=1}^{T_M} \frac{\mathbf{1}_{\{s_t=s, a_t=a\}}}{n_\ell^+(s, a)} \\
& \leq 2L \sum_{s, a} \sum_{t=1}^{T_M} \frac{\mathbf{1}_{\{s_t=s, a_t=a\}}}{n_t^+(s, a)} = 2L \sum_{s, a} \mathbf{1}_{\{n_{T_M+1}(s, a) > 0\}} + 2L \sum_{s, a} \sum_{j=1}^{n_{T_M+1}(s, a)-1} \frac{1}{j} \\
& \leq 2LSA + 2L \sum_{s, a} (1 + \log n_{T_M+1}(s, a)) \\
& \leq 4LSA + 2LSA \log T_M \leq 6LSA \log T_M.
\end{aligned}$$

Here the second inequality is by  $n_\ell^+(s, a) \geq 0.5n_t^+(s, a)$  (the second criterion in determining the epoch length), the third inequality is by  $\sum_{x=1}^n 1/x \leq 1 + \log n$ , and the fourth inequality is by  $n_{T_M+1}(s, a) \leq T_M$ . The proof is complete by noting that  $\log T_M \leq L$ .  $\square$

**Lemma A.5.** For any interval  $m$ ,  $\mathbb{E}[\sum_{t=t_m}^{t_{m+1}-1} \nabla_\ell(s_t, a_t) \mathbf{1}_{\Omega^\ell}] \leq 44B_\star^2$ .

*Proof.* To proceed with the proof, we need the following two technical lemmas.

**Lemma A.6.** Let  $(s, a)$  be a known state-action pair and  $m$  be an interval. If  $\Omega_{s,a}^\ell$  holds, then for any state  $s' \in \mathcal{S}^+$ ,

$$|\theta_*(s'|s, a) - \theta_\ell(s'|s, a)| \leq \frac{1}{8} \sqrt{\frac{c_{\min} \theta_*(s'|s, a)}{SB_\star}} + \frac{c_{\min}}{4SB_\star}.$$

*Proof.* From Lemma A.1, we know that if  $\Omega_{s,a}^\ell$  holds, then

$$|\theta_*(s'|s, a) - \theta_\ell(s'|s, a)| \leq 8\sqrt{\theta_*(s'|s, a)A_\ell(s, a)} + 136A_\ell(s, a),$$

with  $A_\ell(s, a) = \frac{\log(SAn_\ell^+(s, a)/\delta)}{n_\ell^+(s, a)}$ . The proof is complete by noting that  $\log(x)/x$  is decreasing, and that  $n_\ell^+(s, a) \geq \alpha \cdot \frac{B_\star S}{c_{\min}} \log \frac{B_\star SA}{\delta c_{\min}}$  for some large enough constant  $\alpha$  since  $(s, a)$  is known.  $\square$

**Lemma A.7** (Lemma B.15. of Rosenberg et al. [2020]). Let  $(X_t)_{t=1}^\infty$  be a martingale difference sequence adapted to the filtration  $(\mathcal{F}_t)_{t=0}^\infty$ . Let  $Y_n = (\sum_{t=1}^n X_t)^2 - \sum_{t=1}^n \mathbb{E}[X_t^2 | \mathcal{F}_{t-1}]$ . Then  $(Y_n)_{n=0}^\infty$  is a martingale, and in particular if  $\tau$  is a stopping time such that  $\tau \leq c$  almost surely, then  $\mathbb{E}[Y_\tau] = 0$ .

By the definition of the intervals, all the state-action pairs within an interval except possibly the first one are known. Therefore, we bound

$$\mathbb{E} \left[ \sum_{t=t_m}^{t_{m+1}-1} \mathbb{V}_\ell(s_t, a_t) \mathbf{1}_{\Omega_{s_t, a_t}^\ell} \middle| \mathcal{F}_{t_m} \right] = \mathbb{E} \left[ \mathbb{V}_\ell(s_{t_m}, a_{t_m}) \mathbf{1}_{\Omega_{s_{t_m}, a_{t_m}}^\ell} \middle| \mathcal{F}_{t_m} \right] + \mathbb{E} \left[ \sum_{t=t_m+1}^{t_{m+1}-1} \mathbb{V}_\ell(s_t, a_t) \mathbf{1}_{\Omega_{s_t, a_t}^\ell} \middle| \mathcal{F}_{t_m} \right].$$

The first summand is upper bounded by  $B_\star^2$ . To bound the second term, define  $Z_\ell^t := [V(s'_t; \theta_\ell) - \sum_{s' \in \mathcal{S}} \theta_*(s'|s_t, a_t) V(s'; \theta_\ell)] \mathbf{1}_{\Omega_{s_t, a_t}^\ell}$ . Conditioned on  $\mathcal{F}_{t_m}$ ,  $\theta_*$  and  $\theta_\ell$ ,  $(Z_\ell^t)_{t \geq t_m}$  constitutes a martingale difference sequence with respect to the filtration  $(\mathcal{F}_{t+1}^m)_{t \geq t_m}$ , where  $\mathcal{F}_t^m$  is the sigma algebra generated by  $\{(s_{t_m}, a_{t_m}), \dots, (s_t, a_t)\}$ . Moreover,  $t_{m+1} - 1$  is a stopping time with respect to  $(\mathcal{F}_{t+1}^m)_{t \geq t_m}$  and is bounded by  $t_m + 2B_\star/c_{\min}$ . Therefore, Lemma A.7 implies that

$$\mathbb{E} \left[ \sum_{t=t_m+1}^{t_{m+1}-1} \mathbb{V}_\ell(s_t, a_t) \mathbf{1}_{\Omega_{s_t, a_t}^\ell} \middle| \mathcal{F}_{t_m}, \theta_*, \theta_\ell \right] = \mathbb{E} \left[ \left( \sum_{t=t_m+1}^{t_{m+1}-1} Z_\ell^t \mathbf{1}_{\Omega_{s_t, a_t}^\ell} \right)^2 \middle| \mathcal{F}_{t_m}, \theta_*, \theta_\ell \right]. \quad (5)$$

We proceed by bounding  $|\sum_{t=t_m+1}^{t_{m+1}-1} Z_\ell^t \mathbf{1}_{\Omega_{s_t, a_t}^\ell}|$  in terms of  $\sum_{t=t_m+1}^{t_{m+1}-1} \mathbb{V}_\ell(s_t, a_t) \mathbf{1}_{\Omega_{s_t, a_t}^\ell}$  and combine with the left hand side to complete the proof. We have

$$\left| \sum_{t=t_m+1}^{t_{m+1}-1} Z_\ell^t \mathbf{1}_{\Omega_{s_t, a_t}^\ell} \right| = \left| \sum_{t=t_m+1}^{t_{m+1}-1} \left[ V(s'_t; \theta_\ell) - \sum_{s' \in \mathcal{S}} \theta_*(s'|s_t, a_t) V(s'; \theta_\ell) \right] \mathbf{1}_{\Omega_{s_t, a_t}^\ell} \right| \leq \left| \sum_{t=t_m+1}^{t_{m+1}-1} [V(s'_t; \theta_\ell) - V(s_t; \theta_\ell)] \right| \quad (6)$$

$$+ \left| \sum_{t=t_m+1}^{t_{m+1}-1} \left[ V(s_t; \theta_\ell) - \sum_{s' \in \mathcal{S}} \theta_\ell(s'|s_t, a_t) V(s'; \theta_\ell) \right] \right| \quad (7)$$

$$+ \left| \sum_{t=t_m+1}^{t_{m+1}-1} \sum_{s' \in \mathcal{S}^+} [\theta_\ell(s'|s_t, a_t) - \theta_*(s'|s_t, a_t)] \left( V(s'; \theta_\ell) - \sum_{s'' \in \mathcal{S}^+} \theta_*(s''|s_t, a_t) V(s''; \theta_\ell) \right) \mathbf{1}_{\Omega_{s_t, a_t}^\ell} \right|. \quad (8)$$

where (8) is by the fact that  $\theta_\ell(\cdot|s_t, a_t), \theta_*(\cdot|s_t, a_t)$  are probability distributions and  $\sum_{s'' \in \mathcal{S}^+} \theta_*(s''|s_t, a_t) V(s''; \theta_\ell)$  is independent of  $s'$  and  $V(g; \theta_\ell) = 0$ . (6) is a telescopic sum (recall that  $s_{t+1} = s'_t$  if  $s'_t \neq g$ ) and is bounded by  $B_\star$ . It follows from the Bellman equation that (7) is equal to  $\sum_{t=t_m+1}^{t_{m+1}-1} c(s_t, a_t)$ . By definition, the interval ends as soon as the cost accumulates to  $B_\star$  during the interval. Moreover, since  $V(\cdot; \theta_\ell) \leq B_\star$ , the algorithm does not choose an action with

instantaneous cost more than  $B_*$ . This implies that  $\sum_{t=t_m+1}^{t_{m+1}-1} c(s_t, a_t) \leq 2B_*$ . To bound (8) we use the Bernstein confidence set, but taking into account that all the state-action pairs in the summation are known, we can use Lemma A.6 to obtain

$$\begin{aligned}
& \sum_{s' \in \mathcal{S}^+} (\theta_\ell(s'|s_t, a_t) - \theta_*(s'|s_t, a_t)) \left( V(s'; \theta_\ell) - \sum_{s'' \in \mathcal{S}^+} \theta_*(s''|s_t, a_t) V(s''; \theta_\ell) \right) \mathbf{1}_{\Omega_{s_t, a_t}^\ell} \\
& \leq \sum_{s' \in \mathcal{S}^+} \frac{1}{8} \sqrt{\frac{c_{\min} \theta_*(s'|s_t, a_t) (V(s'; \theta_\ell) - \sum_{s'' \in \mathcal{S}^+} \theta_*(s''|s_t, a_t) V(s''; \theta_\ell))^2 \mathbf{1}_{\Omega_{s_t, a_t}^\ell}}{SB_*}} \\
& \quad + \sum_{s' \in \mathcal{S}^+} \frac{c_{\min}}{4SB_*} \left| V(s'; \theta_\ell) - \sum_{s'' \in \mathcal{S}^+} \theta_*(s''|s_t, a_t) V(s''; \theta_\ell) \right| \\
& \leq \frac{1}{4} \sqrt{\frac{c_{\min} \mathbb{V}_\ell(s_t, a_t) \mathbf{1}_{\Omega_{s_t, a_t}^\ell}}{B_*}} + \frac{c(s_t, a_t)}{2}.
\end{aligned}$$

The last inequality follows from Cauchy-Schwarz inequality,  $|\mathcal{S}^+| \leq 2S$ ,  $|V(\cdot; \theta_\ell)| \leq B_*$ , and  $c_{\min} \leq c(s_t, a_t)$ . Summing over the time steps in interval  $m$  and applying Cauchy-Schwarz, we get

$$\begin{aligned}
\sum_{t=t_m+1}^{t_{m+1}-1} \left[ \frac{1}{4} \sqrt{\frac{c_{\min} \mathbb{V}_\ell(s_t, a_t) \mathbf{1}_{\Omega_{s_t, a_t}^\ell}}{B_*}} + \frac{c(s_t, a_t)}{2} \right] & \leq \frac{1}{4} \sqrt{(t_{m+1} - t_m) \frac{c_{\min} \sum_{t=t_m+1}^{t_{m+1}-1} \mathbb{V}_\ell(s_t, a_t) \mathbf{1}_{\Omega_{s_t, a_t}^\ell}}{B_*}} \\
& \quad + \frac{\sum_{t=t_m+1}^{t_{m+1}-1} c(s_t, a_t)}{2} \\
& \leq \frac{1}{4} \sqrt{2 \sum_{t=t_m+1}^{t_{m+1}-1} \mathbb{V}_\ell(s_t, a_t) \mathbf{1}_{\Omega_{s_t, a_t}^\ell}} + B_*.
\end{aligned}$$

The last inequality follows from the fact that duration of interval  $m$  is at most  $2B_*/c_{\min}$  and its cumulative cost is at most  $2B_*$ . Substituting these bounds into (5) implies that

$$\begin{aligned}
\mathbb{E} \left[ \sum_{t=t_m+1}^{t_{m+1}-1} \mathbb{V}_\ell(s_t, a_t) \mathbf{1}_{\Omega_{s_t, a_t}^\ell} \middle| \mathcal{F}_{t_m}, \theta_*, \theta_\ell \right] & \leq \mathbb{E} \left[ \left( 4B_* + \frac{1}{4} \sqrt{2 \sum_{t=t_m+1}^{t_{m+1}-1} \mathbb{V}_\ell(s_t, a_t) \mathbf{1}_{\Omega_{s_t, a_t}^\ell}} \right)^2 \middle| \mathcal{F}_{t_m}, \theta_*, \theta_\ell \right] \\
& \leq 32B_*^2 + \frac{1}{4} \mathbb{E} \left[ \sum_{t=t_m+1}^{t_{m+1}-1} \mathbb{V}_\ell(s_t, a_t) \mathbf{1}_{\Omega_{s_t, a_t}^\ell} \middle| \mathcal{F}_{t_m}, \theta_*, \theta_\ell \right],
\end{aligned}$$

where the last inequality is by  $(a+b)^2 \leq 2(a^2+b^2)$  with  $b = \frac{1}{4} \sqrt{2 \sum_{t=t_m+1}^{t_{m+1}-1} \mathbb{V}_\ell(s_t, a_t) \mathbf{1}_{\Omega_{s_t, a_t}^\ell}}$  and  $a = 4B_*$ . Rearranging implies that  $\mathbb{E} \left[ \sum_{t=t_m+1}^{t_{m+1}-1} \mathbb{V}_\ell(s_t, a_t) \mathbf{1}_{\Omega_{s_t, a_t}^\ell} \middle| \mathcal{F}_{t_m}, \theta_*, \theta_\ell \right] \leq 43B_*^2$  and the proof is complete.  $\square$

$\square$

## A.5 PROOF OF THEOREM 3.5

**Theorem** (restatement of Theorem 3.5). Suppose Assumptions 2.1 and 3.4 hold. Then, the regret bound of the PSRL-SSP algorithm is bounded as

$$R_K = \mathcal{O} \left( B_* S \sqrt{K} A L^2 + S^2 A \sqrt{\frac{B_*^3}{c_{\min}}} L^2 \right),$$

where  $L = \log(B_* S A K c_{\min}^{-1})$ .



*Proof.* Denote by  $C_M$  the total cost after  $M$  intervals. Recall that

$$\mathbb{E}[C_M] = K\mathbb{E}[V(s_{\text{init}}; \theta_*)] + R_M = K\mathbb{E}[V(s_{\text{init}}; \theta_*)] + R_M^1 + R_M^2 + R_M^3$$

Using Lemmas 4.3, 4.4, and 4.5 with  $\delta = 1/K$  obtains

$$\begin{aligned} \mathbb{E}[C_M] &\leq K\mathbb{E}[V(s_{\text{init}}; \theta_*)] \\ &\quad + \mathcal{O}\left(B_*\mathbb{E}[L_M] + B_*S\sqrt{MA\log^2(SAK\mathbb{E}[T_M])} + B_*S^2A\log^2(SAK\mathbb{E}[T_M])\right). \end{aligned} \quad (9)$$

Recall that  $L_M \leq \sqrt{2SAK\log T_M} + SA\log T_M$ . Taking expectation from both sides and using Jensen's inequality gets us  $\mathbb{E}[L_M] \leq \sqrt{2SAK\log \mathbb{E}[T_M]} + SA\log \mathbb{E}[T_M]$ . Moreover, taking expectation from both sides of (3), plugging in the bound on  $\mathbb{E}[L_M]$ , and concavity of  $\log(x)$  implies

$$M \leq \frac{\mathbb{E}[C_M]}{B_*} + K + \sqrt{2SAK\log \mathbb{E}[T_M]} + SA\log \mathbb{E}[T_M] + \mathcal{O}\left(\frac{B_*S^2A}{c_{\min}} \log \frac{B_*KSA}{c_{\min}}\right).$$

Substituting this bound in (9), using subadditivity of the square root, and simplifying yields

$$\begin{aligned} \mathbb{E}[C_M] &\leq K\mathbb{E}[V(s_{\text{init}}; \theta_*)] + \mathcal{O}\left(B_*S\sqrt{KA\log^2(SAK\mathbb{E}[T_M])} + S\sqrt{B_*\mathbb{E}[C_M]A\log^2(SAK\mathbb{E}[T_M])}\right. \\ &\quad \left.+ B_*S^{\frac{5}{4}}A^{\frac{3}{4}}K^{\frac{1}{4}}\log^{\frac{5}{4}}(SAK\mathbb{E}[T_M]) + S^2A\sqrt{\frac{B_*^3}{c_{\min}}\log^3\frac{B_*SAK\mathbb{E}[T_M]}{c_{\min}}}\right). \end{aligned}$$

Solving for  $\mathbb{E}[C_M]$  (by using the primary inequality that  $x \leq a\sqrt{x} + b$  implies  $x \leq (a + \sqrt{b})^2$  for  $a, b > 0$ ), using  $K \geq S^2A$ ,  $V(s_{\text{init}}; \theta_*) \leq B_*$ , and simplifying the result gives

$$\begin{aligned} \mathbb{E}[C_M] &\leq \left(\mathcal{O}\left(S\sqrt{B_*A\log^2(SAK\mathbb{E}[T_M])}\right)\right. \\ &\quad \left.+ \sqrt{K\mathbb{E}[V(s_{\text{init}}; \theta_*)] + \mathcal{O}\left(B_*S\sqrt{KA\log^{2.5}(SAK\mathbb{E}[T_M])} + S^2A\sqrt{\frac{B_*^3}{c_{\min}}\log^3\frac{B_*SAK\mathbb{E}[T_M]}{c_{\min}}}\right)}\right)^2 \\ &\leq \mathcal{O}\left(B_*S^2A\log^2\frac{SA\mathbb{E}[T_M]}{\delta}\right) \\ &\quad + K\mathbb{E}[V(s_{\text{init}}; \theta_*)] + \mathcal{O}\left(B_*S\sqrt{KA\log^{2.5}(SAK\mathbb{E}[T_M])} + S^2A\sqrt{\frac{B_*^3}{c_{\min}}\log^3\frac{B_*SAK\mathbb{E}[T_M]}{c_{\min}}}\right) \\ &\quad + B_*S\sqrt{KA\log^4(SAK\mathbb{E}[T_M])} + S^2A\left(\frac{B_*^5}{c_{\min}}\log^7\frac{B_*SAK\mathbb{E}[T_M]}{c_{\min}}\right)^{\frac{1}{4}} \\ &\leq K\mathbb{E}[V(s_{\text{init}}; \theta_*)] + \mathcal{O}\left(B_*S\sqrt{KA\log^4SAK\mathbb{E}[T_M]} + S^2A\sqrt{\frac{B_*^3}{c_{\min}}\log^4\frac{B_*SAK\mathbb{E}[T_M]}{c_{\min}}}\right). \end{aligned} \quad (10)$$

Note that by simplifying this bound, we can write  $\mathbb{E}[C_M] \leq \mathcal{O}\left(\sqrt{B_*^3S^4A^2K^2\mathbb{E}[T_M]/c_{\min}}\right)$ . On the other hand, we have that  $c_{\min}T_M \leq C_M$  which implies  $\mathbb{E}[T_M] \leq \mathbb{E}[C_M]/c_{\min}$ . Isolating  $\mathbb{E}[T_M]$  implies  $\mathbb{E}[T_M] \leq \mathcal{O}\left(B_*^3S^4A^2K^2/c_{\min}^3\right)$ . Substituting this bound into (10) yields

$$\mathbb{E}[C_M] \leq K\mathbb{E}[V(s_{\text{init}}; \theta_*)] + \mathcal{O}\left(B_*S\sqrt{KA\log^4\frac{B_*SAK}{c_{\min}}} + S^2A\sqrt{\frac{B_*^3}{c_{\min}}\log^4\frac{B_*SAK}{c_{\min}}}\right).$$

We note that this bound holds for any number of  $M$  intervals as long as the  $K$  episodes have not elapsed. Since,  $c_{\min} > 0$ , this implies that the  $K$  episodes eventually terminate and the claimed bound of the theorem for  $R_K$  holds.  $\square$

## A.6 PROOF OF THEOREM 3.6

**Theorem** (restatement of Theorem 3.6). Suppose Assumption 2.1 holds. Running the PSRL-SSP algorithm with costs  $c_\epsilon(s, a) := \max\{c(s, a), \epsilon\}$  for  $\epsilon = (S^2 A/K)^{2/3}$  yields

$$R_K = \mathcal{O}\left(B_\star S\sqrt{K}A\tilde{L}^2 + (S^2 A)^{\frac{2}{3}} K^{\frac{1}{3}} (B_\star^{\frac{3}{2}} \tilde{L}^2 + T_\star) + S^2 A T_\star^{\frac{3}{2}} \tilde{L}^2\right),$$

where  $\tilde{L} := \log(KB_\star T_\star SA)$  and  $T_\star$  is an upper bound on the expected time the optimal policy takes to reach the goal from any initial state.

*Proof.* Denote by  $T_K^\epsilon$  the time to complete  $K$  episodes if the algorithm runs with the perturbed costs  $c_\epsilon(s, a)$  and let  $V_\epsilon(s_{\text{init}}; \theta_\star)$ ,  $V_\epsilon^\pi(s_{\text{init}}; \theta_\star)$  be the optimal value function and the value function for policy  $\pi$  in the SSP with cost function  $c_\epsilon(s, a)$  and transition kernel  $\theta_\star$ . We can write

$$\begin{aligned} R_K &= \mathbb{E} \left[ \sum_{t=1}^{T_K^\epsilon} c(s_t, a_t) - KV(s_{\text{init}}; \theta_\star) \right] \\ &\leq \mathbb{E} \left[ \sum_{t=1}^{T_K^\epsilon} c_\epsilon(s_t, a_t) - KV(s_{\text{init}}; \theta_\star) \right] \\ &= \mathbb{E} \left[ \sum_{t=1}^{T_K^\epsilon} c_\epsilon(s_t, a_t) - KV_\epsilon(s_{\text{init}}; \theta_\star) \right] + K\mathbb{E} [V_\epsilon(s_{\text{init}}; \theta_\star) - V(s_{\text{init}}; \theta_\star)]. \end{aligned} \quad (11)$$

Theorem 3.5 implies that the first term is bounded by

$$\mathbb{E} \left[ \sum_{t=1}^{T_K^\epsilon} c_\epsilon(s_t, a_t) - KV_\epsilon(s_{\text{init}}; \theta_\star) \right] = \mathcal{O} \left( B_\star^\epsilon S\sqrt{K}A L_\epsilon^2 + S^2 A \sqrt{\frac{B_\star^{\epsilon^3}}{\epsilon}} L_\epsilon^2 \right),$$

with  $L_\epsilon = \log(B_\star^\epsilon SAK/\epsilon)$  and  $B_\star^\epsilon \leq B_\star + \epsilon T_\star$  (to see this note that  $V_\epsilon(s; \theta_\star) \leq V_\epsilon^{\pi^\star}(s; \theta_\star) \leq B_\star + \epsilon T_\star$ ). To bound the second term of (11), we have

$$V_\epsilon(s_{\text{init}}; \theta_\star) \leq V_\epsilon^{\pi^\star}(s_{\text{init}}; \theta_\star) \leq V(s_{\text{init}}; \theta_\star) + \epsilon T_\star.$$

Combining these bounds, we can write

$$R_K = \mathcal{O} \left( B_\star S\sqrt{K}A L_\epsilon^2 + \epsilon T_\star S\sqrt{K}A L_\epsilon^2 + S^2 A \sqrt{\frac{(B_\star + \epsilon T_\star)^3}{\epsilon}} L_\epsilon^2 + K T_\star \epsilon \right).$$

Substituting  $\epsilon = (S^2 A/K)^{2/3}$ , and simplifying the result with  $K \geq S^2 A$  and  $B_\star \leq T_\star$  (since  $c(s, a) \leq 1$ ) implies

$$R_K = \mathcal{O} \left( B_\star S\sqrt{K}A\tilde{L}^2 + (S^2 A)^{\frac{2}{3}} K^{\frac{1}{3}} (B_\star^{\frac{3}{2}} \tilde{L}^2 + T_\star) + S^2 A T_\star^{\frac{3}{2}} \tilde{L}^2 \right),$$

where  $\tilde{L} = \log(KB_\star T_\star SA)$ . This completes the proof.  $\square$

## References

Aviv Rosenberg, Alon Cohen, Yishay Mansour, and Haim Kaplan. Near-optimal regret bounds for stochastic shortest path. In *International Conference on Machine Learning*, pages 8210–8219. PMLR, 2020.
