# Supplementary material
Source: ML conference proceedings conference paper supplement (https://openreview.net/forum?id=l1gmW9YBcWb)

RandomMDP

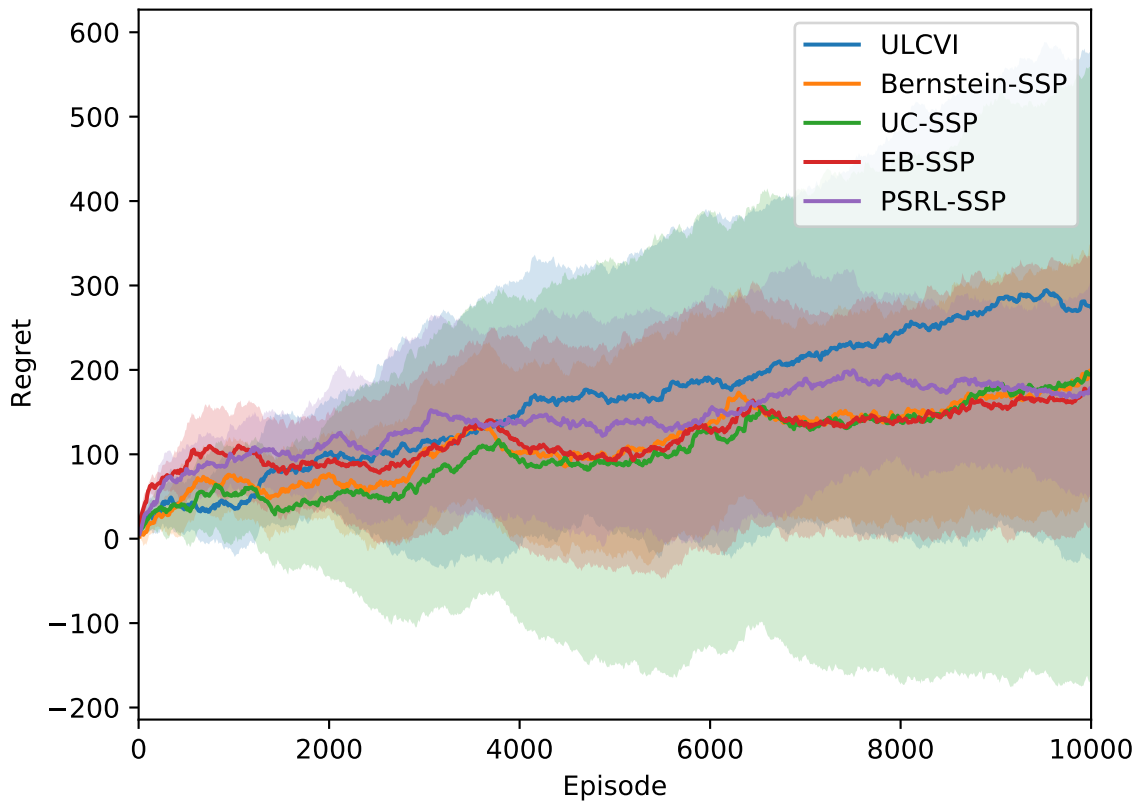

Supplement: supplementary_material [file attachment]

GridWorld

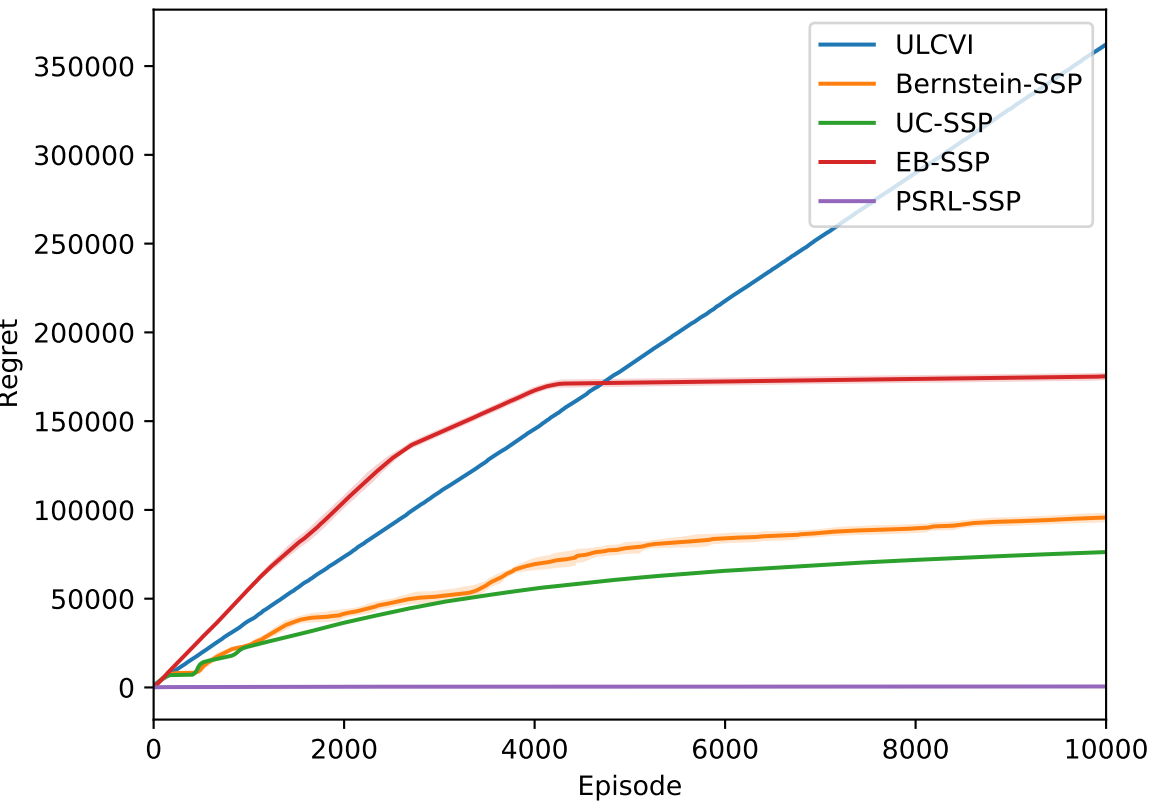

Supplement: supplementary_material [file attachment]

SSP-MountainCar

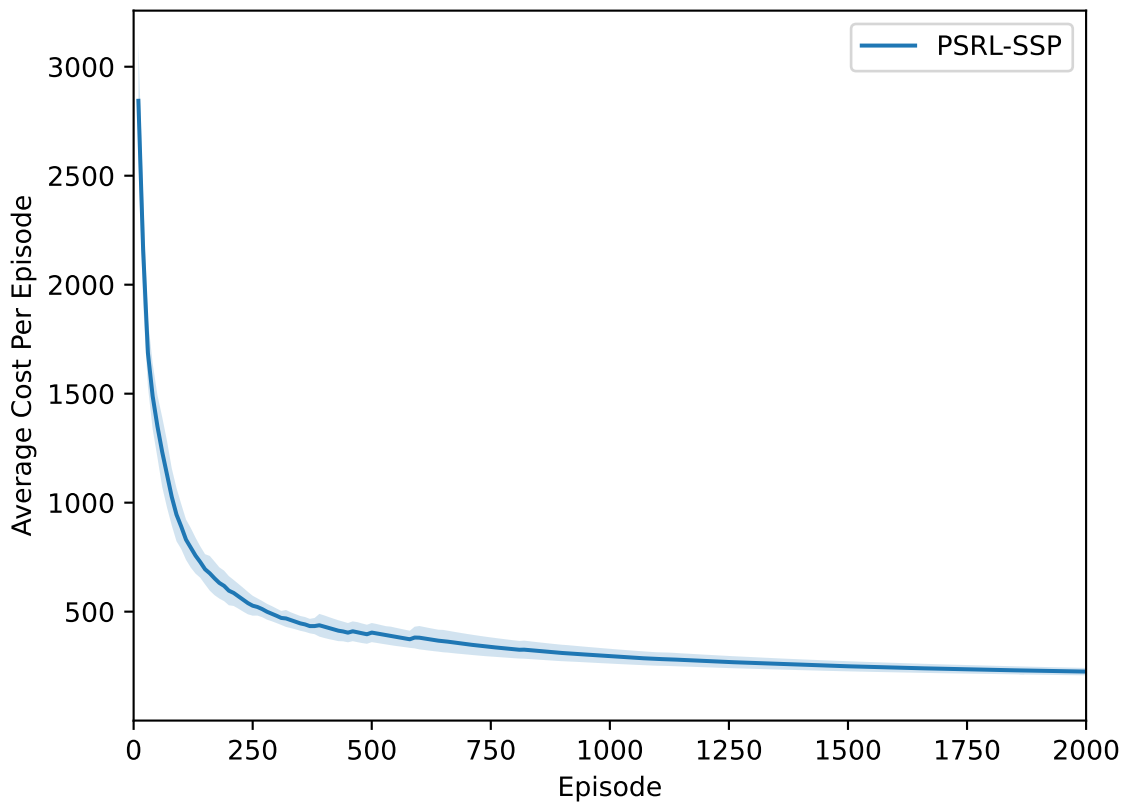

Supplement: supplementary_material [file attachment]

RandomMDP

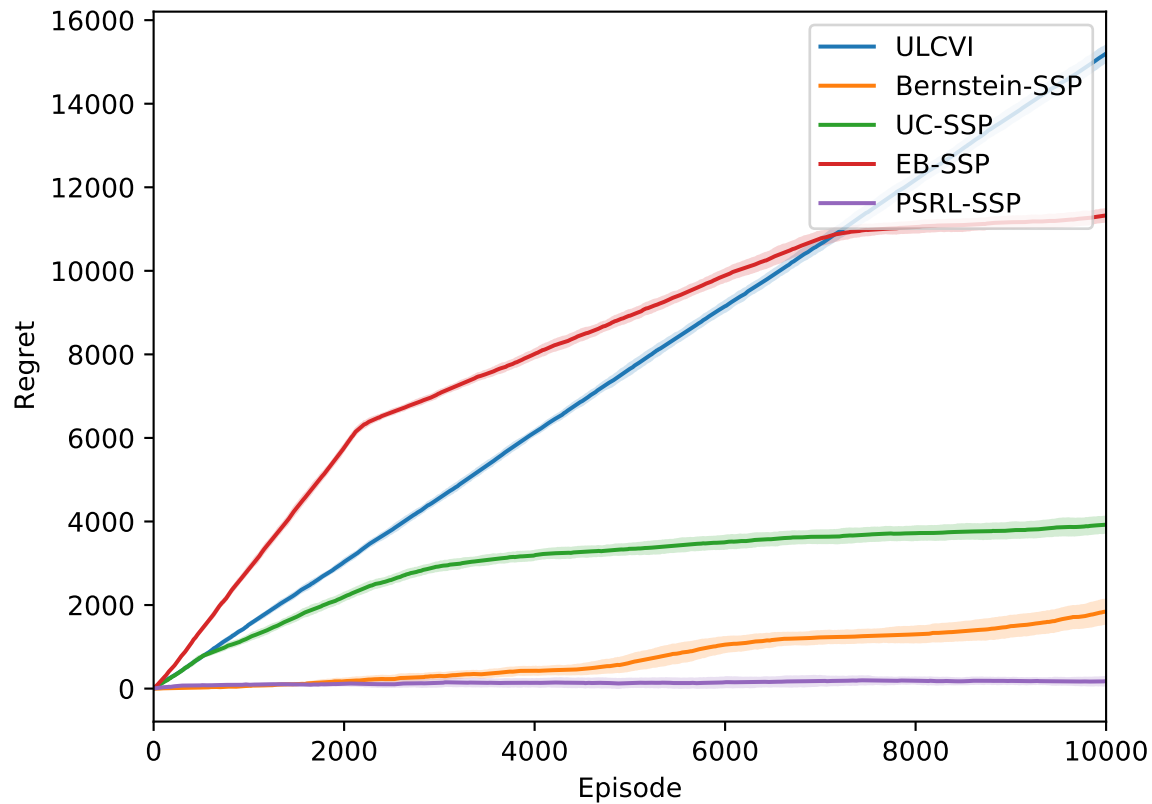

Supplement: supplementary_material [file attachment]

# GridWorld

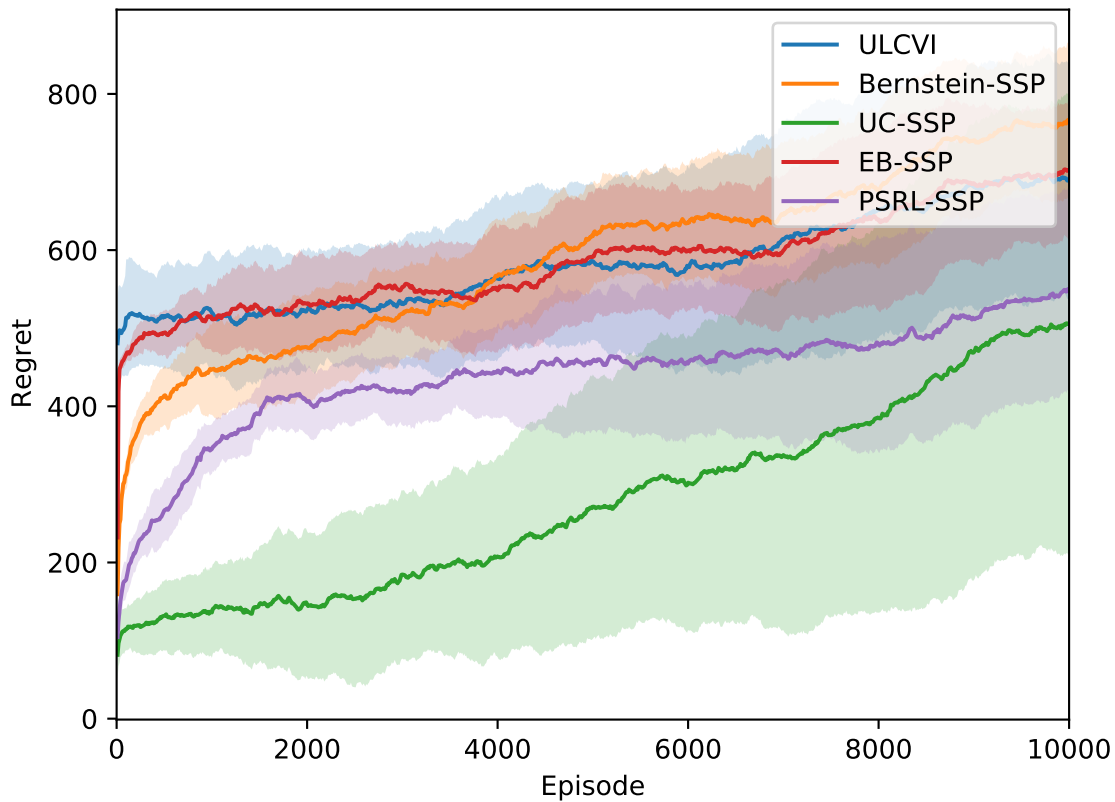

Supplement: supplementary_material [file attachment]
